# Supplementary material
Source: HighWire-hosted journal article supplement (https://erj.ersjournals.com/content/56/4/2002608)
Supplement: inline-supplementary-material-1 [file inline-supplementary-material-1.pdf]

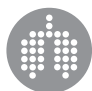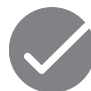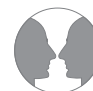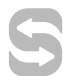

SHAREABLE PDF

# *In vivo* demonstration of pulmonary microvascular involvement in COVID-19 using dual-energy computed tomography

Salim Si-Mohamed <sup>1,2</sup>, Nader Chebib<sup>3</sup>, Monica Sigovan<sup>2</sup>, Lea Zumbihl<sup>1,4</sup>,  
Ségolène Turquier<sup>3</sup>, Sara Boccalini<sup>1,2</sup>, Loïc Bousset<sup>1,2</sup>, Jean-  
Francois Mornex<sup>3,4,5</sup>, Vincent Cottin <sup>3,4,5</sup> and Philippe Douek<sup>1,2</sup>

**Affiliations:** <sup>1</sup>Radiology Dept, Hospices Civils de Lyon, CHU Louis Pradel, Lyon, France. <sup>2</sup>Claude Bernard Lyon 1 University, INSA-Lyon, UJM-Saint Etienne, CNRS, Inserm, CREATIS UMR 5220, U1206, Lyon, France. <sup>3</sup>Pneumology Dept, Hospices Civils de Lyon, National Reference Center for Rare Diseases, Lyon, France. <sup>4</sup>Claude Bernard Lyon 1 University, University of Lyon, INRA, UMR754, Lyon, France. <sup>5</sup>Pulmonary Diseases, Competence Center for severe pulmonary hypertension, Lyon, France.

**Correspondence:** Salim Si-Mohamed, CHU Louis Pradel, Département d'imagerie cardiovasculaire, 59 Boulevard Pinel, 69500 Bron, France. E-mail: salim.si-mohamed@chu-lyon.fr

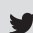

@ERSpublications

**In COVID-19 pneumonia, dual-energy computed tomography has shown two patterns of lung perfusion along the course of the disease: an increase in perfusion blood volume (PBV) with ground-glass opacities and a decrease in PBV with consolidation** <https://bit.ly/2Zh0XcI>

**Cite this article as:** Si-Mohamed S, Chebib N, Sigovan M, *et al.* *In vivo* demonstration of pulmonary microvascular involvement in COVID-19 using dual-energy computed tomography. *Eur Respir J* 2020; 56: 2002608 [<https://doi.org/10.1183/13993003.02608-2020>].

This single-page version can be shared freely online.

## *To the Editor:*

Vascular involvement in coronavirus disease 2019 (COVID-19) has been suggested by several observations, such as the high rate of pulmonary embolism [1], the prothrombotic state and the proinflammatory biological profile [2, 3], as well as the pathological findings of severe endothelial injury and diffuse thrombosis [4]. Dual-energy computed tomography (DECT) allows specific imaging of the iodinated contrast agent distribution within the lung, which has been demonstrated as a surrogate marker of lung perfusion [5, 6]. Therefore, our goal was to assess *in vivo* pulmonary microvascular involvement in patients with COVID-19 pneumonia by using DECT and to determine whether vascular changes vary during the course of the disease.
